# Supplementary material
Source: ML conference proceedings conference paper supplement (https://proceedings.neurips.cc/paper_files/paper/2025/hash/281743161c91ddaa3d9c4dca2eb795c4-Abstract.html)
Supplement: Supplementary file 1 [file camera_appendix.pdf › camera_appendix.pdf]

# Supplementary Material for Aligning Text-to-Image Diffusion Models to Human Preference by Classification

## 1 Theorem proof

**Theorem 1.** We say a diffusion model  $\epsilon_{\text{ali}}(\mathbf{x}_t, \mathbf{y}, t)$  is ideal alignment if it satisfies  $\|\epsilon_{\text{ali}}(\mathbf{x}_{t;\mathbf{y}}^+, \mathbf{y}, t) - \epsilon\|_2^2 = 0$  and  $\|\epsilon_{\text{ali}}(\mathbf{x}_{t;\mathbf{y}}^-, \mathbf{y}, t) - \epsilon\|_2^2 = \delta$  for any  $\mathbf{y}$ . Here,  $\mathbf{x}_{t;\mathbf{y}}^+ = \sqrt{\alpha_t}\mathbf{x}_{\mathbf{y}}^+ + \sigma_t\epsilon$  and  $\mathbf{x}_{t;\mathbf{y}}^- = \sqrt{\alpha_t}\mathbf{x}_{\mathbf{y}}^- + \sigma_t\epsilon$ . When the reference model  $\epsilon_{\text{ref}}(\mathbf{x}_t, \mathbf{y}, t) = \epsilon_{\text{ali}}(\mathbf{x}_t, \mathbf{y}, t)$  is an ideal alignment model and  $s_{\text{ali}}(\mathbf{x}, \mathbf{y}) = w_t \|\epsilon - \epsilon_{\text{ali}}(\sqrt{\alpha_t}\mathbf{x} + \sigma_t\epsilon, \mathbf{y}, t)\|_2^2$ , the AM-Softmax loss is upper bounded by the Diffusion-DPO loss. Specifically, we have

$$\begin{aligned} & \log(1 + \exp(-(\mathbb{E}_{\epsilon, t}[s_{\theta}(\mathbf{x}_{\mathbf{y}}^-, \mathbf{y})] - \delta))) \exp(\mathbb{E}_{\epsilon, t}[s_{\theta}(\mathbf{x}_{\mathbf{y}}^+, \mathbf{y})]) \\ & \leq \mathbb{E}_{\epsilon, t}[\log(1 + \exp(-(s_{\theta}(\mathbf{x}_{\mathbf{y}}^-, \mathbf{y}) - s_{\text{ali}}(\mathbf{x}_{\mathbf{y}}^-, \mathbf{y}))) \exp(s_{\theta}(\mathbf{x}_{\mathbf{y}}^+, \mathbf{y}) - s_{\text{ali}}(\mathbf{x}_{\mathbf{y}}^+, \mathbf{y})))] \end{aligned} \quad (1)$$

*Proof.* Under ideal alignment, we replace  $\epsilon_{\text{ref}}$  with  $\epsilon_{\text{ali}}$  in the Diffusion-DPO loss  $\mathcal{L}_{\text{DPO}}$ :

$$\mathcal{L}_{\text{DPO}} = \mathbb{E}_{\epsilon, t}[\log(1 + \exp(-(s_{\theta}(\mathbf{x}_{\mathbf{y}}^-, \mathbf{y}) - s_{\text{ali}}(\mathbf{x}_{\mathbf{y}}^-, \mathbf{y}))) \exp(s_{\theta}(\mathbf{x}_{\mathbf{y}}^+, \mathbf{y}) - s_{\text{ali}}(\mathbf{x}_{\mathbf{y}}^+, \mathbf{y})))] \quad (2)$$

Since  $\|\epsilon_{\text{ali}}(\mathbf{x}_{t;\mathbf{y}}^+, \mathbf{y}, t) - \epsilon\|_2^2 = 0$ , we have  $s_{\text{ali}}(\mathbf{x}_{\mathbf{y}}^+, \mathbf{y}) = 0$ , so the loss reduces to:

$$\mathcal{L}_{\text{DPO}} = \mathbb{E}_{\epsilon, t}[\log(1 + \exp(-(s_{\theta}(\mathbf{x}_{\mathbf{y}}^-, \mathbf{y}) - s_{\text{ali}}(\mathbf{x}_{\mathbf{y}}^-, \mathbf{y}))) \exp(s_{\theta}(\mathbf{x}_{\mathbf{y}}^+, \mathbf{y})))] \quad (3)$$

Now applying Jensen's inequality (due to the convexity of the function  $f(z) = \log(1 + e^z)$ ), we obtain:

$$\mathcal{L}_{\text{DPO}} \geq \log(1 + \exp(-(\mathbb{E}_{\epsilon, t}[s_{\theta}(\mathbf{x}_{\mathbf{y}}^-, \mathbf{y})] - s_{\text{ali}}(\mathbf{x}_{\mathbf{y}}^-, \mathbf{y}))) \exp(\mathbb{E}_{\epsilon, t}[s_{\theta}(\mathbf{x}_{\mathbf{y}}^+, \mathbf{y})])) \quad (4)$$

We note that  $w_t$  is a finite constant. Without loss of generality, we assume  $w_t < 1$ . Now, under ideal alignment  $s_{\text{ali}}(\mathbf{x}_{\mathbf{y}}^-, \mathbf{y}) = w_t \cdot \delta$ , we have

$$\begin{aligned} \mathcal{L}_{\text{DPO}} & \geq \log(1 + \exp(-(\mathbb{E}_{\epsilon, t}[s_{\theta}(\mathbf{x}_{\mathbf{y}}^-, \mathbf{y})] - \mathbb{E}_{\epsilon, t}[s_{\text{ali}}(\mathbf{x}_{\mathbf{y}}^-, \mathbf{y})])) \exp(\mathbb{E}_{\epsilon, t}[s_{\theta}(\mathbf{x}_{\mathbf{y}}^+, \mathbf{y})])) \\ & \geq \log(1 + \exp(-(\mathbb{E}_{\epsilon, t}[s_{\theta}(\mathbf{x}_{\mathbf{y}}^-, \mathbf{y})] - \mathbb{E}_{\epsilon, t}[w_t] \cdot \delta)) \exp(\mathbb{E}_{\epsilon, t}[s_{\theta}(\mathbf{x}_{\mathbf{y}}^+, \mathbf{y})])) \\ & \geq \log(1 + \exp(-(\mathbb{E}_{\epsilon, t}[s_{\theta}(\mathbf{x}_{\mathbf{y}}^-, \mathbf{y})] - \delta))) \exp(\mathbb{E}_{\epsilon, t}[s_{\theta}(\mathbf{x}_{\mathbf{y}}^+, \mathbf{y})]), \end{aligned} \quad (5)$$

which matches the AM-Softmax-style upper bound, as claimed.  $\square$

**Theorem 2.** Let  $\mathbf{Y} = \{\mathbf{y}_i\}_{i=1}^N$  denote  $N$  text prompts and  $D = \{\mathbf{x}_{\mathbf{y}_i}\}$  be corresponding aligned images. We assume that the prior prompt distribution  $p(\mathbf{y})$  and image distribution  $p(\mathbf{x})$  are uniform. To describe the discriminative ability, we define the conditional probability  $p(\mathbf{x}|\mathbf{y})$  as

$$p(\mathbf{y}|\mathbf{x}_{\mathbf{y}_i}) = \begin{cases} \frac{n}{N} & \mathbf{y} = \mathbf{y}_i, \\ \frac{N-n}{N(N-1)} & \mathbf{y} \in \mathbf{Y} - \{\mathbf{y}_i\}. \end{cases} \quad \text{where } n < N. \quad (6)$$

Then,  $p(\mathbf{x}|\mathbf{y}) = p(\mathbf{y}|\mathbf{x})$  and the optimal diffusion model  $\epsilon_{\text{opt}}(\mathbf{x}_t, \mathbf{y}, t)$ , which achieves minimal diffusion loss over both the training set and the test set, over  $D$  is given by:

$$\epsilon_{\text{opt}}(\mathbf{x}_t, \mathbf{y}, t) = \sum_{\mathbf{x}^{(i)} \in D} \frac{w_i}{\sum_{\mathbf{x}^{(j)} \in D} w_j} \cdot \epsilon_i, \quad (7)$$

$$\text{where } \epsilon_i = \frac{\mathbf{x}_t - \sqrt{\alpha_t}\mathbf{x}^{(i)}}{\sigma_t}, \lambda = \frac{n(N-1)}{N-n}, w_i = \begin{cases} \lambda \cdot \exp\left(-\frac{\|\mathbf{x}_t - \sqrt{\alpha_t}\mathbf{x}^{(i)}\|_2^2}{2\sigma_t^2}\right), & \mathbf{x}^{(i)} \in \{\mathbf{x}_{\mathbf{y}}\}, \\ \exp\left(-\frac{\|\mathbf{x}_t - \sqrt{\alpha_t}\mathbf{x}^{(i)}\|_2^2}{2\sigma_t^2}\right), & \mathbf{x}^{(i)} \in D - \{\mathbf{x}_{\mathbf{y}}\}. \end{cases}$$

*Proof.* As stated in the paper, we assume that each text prompt  $y$  corresponds to a single aligned image  $\mathbf{x}$ , forming a one-to-one mapping. Under the assumption that the prior distributions  $p(y)$  and  $p(\mathbf{x})$  are uniform over the same support, Bayes' rule implies:

$$p(\mathbf{x} | y) p(y) = p(y | \mathbf{x}) p(\mathbf{x}). \quad (8)$$

Since the priors are uniform and equal, they cancel out, leading to:

$$p(\mathbf{x} | y) = p(y | \mathbf{x}). \quad (9)$$

The optimal diffusion model minimizes the expected denoising error:

$$\mathbb{E}_{\mathbf{x}, t, y} [\|\epsilon_\theta(\mathbf{x}_t, t, y) - \epsilon\|_2^2], \quad (10)$$

over all models  $\epsilon_\theta$  in the hypothesis space. Since this objective is additive over independent input tuples  $(\mathbf{x}_t, t, y)$ , the minimization implies pointwise optimality. That is, the optimal predictor  $\epsilon_{\text{opt}}$  satisfies:

$$\mathbb{E}_{\mathbf{x}^{(i)} \sim p(\mathbf{x}^{(i)} | \mathbf{x}_t, y)} [\|\epsilon_{\text{opt}}(\mathbf{x}_t, t, y) - \epsilon_i\|_2^2] = \min_{\epsilon_\theta} \mathbb{E}_{\mathbf{x}^{(i)} \sim p(\mathbf{x}^{(i)} | \mathbf{x}_t, y)} [\|\epsilon_\theta(\mathbf{x}_t, t, y) - \epsilon_i\|_2^2], \quad (11)$$

where  $\epsilon_i = \frac{\mathbf{x}_t - \sqrt{\alpha_t} \mathbf{x}^{(i)}}{\sigma_t}$  is the noise corresponding to candidate  $\mathbf{x}^{(i)}$ .

To find the optimal solution, we take the gradient of the expected error with respect to the prediction and set it to zero:

$$\frac{\partial}{\partial \epsilon_\theta(\mathbf{x}_t, t, y)} \mathbb{E}_{\mathbf{x}^{(i)} \sim p(\mathbf{x}^{(i)} | \mathbf{x}_t, y)} [\|\epsilon_\theta(\mathbf{x}_t, t, y) - \epsilon_i\|_2^2] = 0. \quad (12)$$

Solving this yields the optimal denoising prediction:

$$\begin{aligned} \mathbb{E}_{\mathbf{x}^{(i)} \sim p(\mathbf{x}^{(i)} | \mathbf{x}_t, y)} [\|\epsilon_{\text{opt}}(\mathbf{x}_t, t, y) - \epsilon_i\|_2^2] &= 0, \\ \Downarrow \\ \sum_{\mathbf{x}^{(i)} \in D} p(\mathbf{x}^{(i)} | \mathbf{x}_t, y) \epsilon_{\text{opt}}(\mathbf{x}_t, t, y) &= \epsilon_{\text{opt}}(\mathbf{x}_t, t, y) = \sum_{\mathbf{x}^{(i)} \in D} p(\mathbf{x}^{(i)} | \mathbf{x}_t, y) \epsilon_i. \end{aligned} \quad (13)$$

We can write this expectation as a weighted sum:

$$\epsilon_{\text{opt}}(\mathbf{x}_t, t, y) = \underbrace{\sum_{\mathbf{x}^{(i)} \in \{\mathbf{x}_y\}} p(\mathbf{x}^{(i)} | \mathbf{x}_t, y) \epsilon_i}_{\text{A}} + \underbrace{\sum_{\mathbf{x}^{(i)} \in D - \{\mathbf{x}_y\}} p(\mathbf{x}^{(i)} | \mathbf{x}_t, y) \epsilon_i}_{\text{B}}. \quad (14)$$

Here, term A represents the contribution from positive candidates  $\mathbf{x}_y$  that aligned with  $y$ , while term B accounts for the negative influence of all other candidates in  $D$ .

The conditional distribution  $p(\mathbf{x}^{(i)} | \mathbf{x}_t, y)$  captures both aligned (positive) and unaligned (negative) samples. It can be computed via Bayes' rule as:

$$p(\mathbf{x}^{(i)} | \mathbf{x}_t, y) = \frac{p(\mathbf{x}^{(i)} | y) p(\mathbf{x}_t | \mathbf{x}^{(i)}, y)}{p(\mathbf{x}_t | y)} = \frac{p(\mathbf{x}^{(i)} | y) q(\mathbf{x}_t | \mathbf{x}^{(i)})}{p(\mathbf{x}_t | y)}, \quad (15)$$

where the transition distribution  $q(\mathbf{x}_t | \mathbf{x}^{(i)})$  is Gaussian:  $q(\mathbf{x}_t | \mathbf{x}^{(i)}) = \mathcal{N}(\mathbf{x}_t | \sqrt{\alpha_t} \mathbf{x}^{(i)}, \sigma_t^2 I)$ .

Substituting  $p(\mathbf{x}^{(i)} | \mathbf{x}_t, y)$  and  $\epsilon_i$  into the equation for A, we obtain:

$$\begin{aligned} \text{A} &= \sum_{\mathbf{x}^{(i)} \in \{\mathbf{x}_y\}} p(\mathbf{x}^{(i)} | \mathbf{x}_t, y) \frac{\mathbf{x}_t - \sqrt{\alpha_t} \mathbf{x}^{(i)}}{\sigma_t} \\ &= \sum_{\mathbf{x}^{(i)} \in \{\mathbf{x}_y\}} \frac{p(\mathbf{x}^{(i)} | y) q(\mathbf{x}_t | \mathbf{x}^{(i)})}{p(\mathbf{x}_t | y)} \frac{\mathbf{x}_t - \sqrt{\alpha_t} \mathbf{x}^{(i)}}{\sigma_t} \\ &= \sum_{\mathbf{x}^{(i)} \in \{\mathbf{x}_y\}} \frac{p(\mathbf{x}^{(i)} | y)}{p(\mathbf{x}_t | y)} \frac{1}{(2\pi\sigma_t)^{\frac{n}{2}}} \exp\left(-\frac{\|\mathbf{x}_t - \sqrt{\alpha_t} \mathbf{x}^{(i)}\|_2^2}{2\sigma_t^2}\right) \frac{\mathbf{x}_t - \sqrt{\alpha_t} \mathbf{x}^{(i)}}{\sigma_t}. \end{aligned} \quad (16)$$



To avoid numerical problem caused by  $\frac{1}{(2\pi\sigma_t)^{\frac{n}{2}}}$  and intractable  $\frac{p(\mathbf{x}^{(i)}|\mathbf{y})}{p(\mathbf{x}_t|\mathbf{y})}$ , we reorganize this equation using softmax function:

$$A = \sum_{\mathbf{x}^{(i)} \in \{\mathbf{x}_y\}} \frac{\frac{p(\mathbf{x}^{(i)}|\mathbf{y})}{p(\mathbf{x}_t|\mathbf{y})} \frac{1}{(2\pi\sigma_t)^{\frac{n}{2}}} \exp\left(-\frac{\|\mathbf{x}_t - \sqrt{\alpha_t}\mathbf{x}^{(i)}\|_2^2}{2\sigma_t^2}\right)}{\sum_{j=1}^{|D|} p(\mathbf{x}^{(j)} | \mathbf{x}_t, \mathbf{y})} \frac{\mathbf{x}_t - \sqrt{\alpha_t}\mathbf{x}^{(i)}}{\sigma_t}. \quad (17)$$

To simplify the expression, we introduce

$$\epsilon_i = \frac{\mathbf{x}_t - \sqrt{\alpha_t}\mathbf{x}^{(i)}}{\sigma_t}, \quad \text{sim}(\mathbf{x}_t, \mathbf{x}^{(i)}) := \exp\left(-\frac{\|\mathbf{x}_t - \sqrt{\alpha_t}\mathbf{x}^{(i)}\|_2^2}{2\sigma_t^2}\right). \quad (18)$$

We rewrite the expression as follows

$$\begin{aligned} A &= \sum_{\mathbf{x}^{(i)} \in \{\mathbf{x}_y\}} \frac{\frac{p(\mathbf{x}^{(i)}|\mathbf{y})}{p(\mathbf{x}_t|\mathbf{y})} \text{sim}(\mathbf{x}_t, \mathbf{x}^{(i)})}{\sum_{j=1}^{|\{\mathbf{x}_y\}|} \frac{p(\mathbf{x}^{(j)}|\mathbf{y})}{p(\mathbf{x}_t|\mathbf{y})} \text{sim}(\mathbf{x}_t, \mathbf{x}^{(j)}) + \sum_{j=1}^{|D-\{\mathbf{x}_y\}|} \frac{p(\mathbf{x}^{(j)}|\mathbf{y})}{p(\mathbf{x}_t|\mathbf{y})} \text{sim}(\mathbf{x}_t, \mathbf{x}^{(j)})} \epsilon_i \\ &= \sum_{\mathbf{x}^{(i)} \in \{\mathbf{x}_y\}} \frac{\frac{n}{N} \text{sim}(\mathbf{x}_t, \mathbf{x}^{(i)})}{\sum_{j=1}^{|\{\mathbf{x}_y\}|} \frac{n}{N} \text{sim}(\mathbf{x}_t, \mathbf{x}^{(j)}) + \sum_{j=1}^{|D-\{\mathbf{x}_y\}|} \frac{N-n}{N(N-1)} \text{sim}(\mathbf{x}_t, \mathbf{x}^{(j)})} \epsilon_i \\ &= \sum_{\mathbf{x}^{(i)} \in \{\mathbf{x}_y\}} \frac{\frac{n(N-1)}{N-n} \text{sim}(\mathbf{x}_t, \mathbf{x}^{(i)})}{\sum_{j=1}^{|\{\mathbf{x}_y\}|} \frac{n(N-1)}{N-n} \text{sim}(\mathbf{x}_t, \mathbf{x}^{(j)}) + \sum_{j=1}^{|D-\{\mathbf{x}_y\}|} \text{sim}(\mathbf{x}_t, \mathbf{x}^{(j)})} \epsilon_i \\ &= \sum_{\mathbf{x}^{(i)} \in \{\mathbf{x}_y\}} \frac{\lambda \cdot \text{sim}(\mathbf{x}_t, \mathbf{x}^{(i)})}{\sum_{\mathbf{x}^{(j)} \in \{\mathbf{x}_y\}} \lambda \cdot \text{sim}(\mathbf{x}_t, \mathbf{x}^{(j)}) + \sum_{\mathbf{x}^{(j)} \in D-\{\mathbf{x}_y\}} \text{sim}(\mathbf{x}_t, \mathbf{x}^{(j)})} \epsilon_i. \end{aligned} \quad (19)$$

where  $\lambda = \frac{n(N-1)}{N-n}$ . Similarly,

$$\begin{aligned} B &= \sum_{\mathbf{x}^{(i)} \in D-\{\mathbf{x}_y\}} \frac{\frac{p(\mathbf{x}^{(i)}|\mathbf{y})}{p(\mathbf{x}_t|\mathbf{y})} \text{sim}(\mathbf{x}_t, \mathbf{x}^{(i)})}{\sum_{j=1}^{|\{\mathbf{x}_y\}|} \frac{p(\mathbf{x}^{(j)}|\mathbf{y})}{p(\mathbf{x}_t|\mathbf{y})} \text{sim}(\mathbf{x}_t, \mathbf{x}^{(j)}) + \sum_{j=1}^{|D-\{\mathbf{x}_y\}|} \frac{p(\mathbf{x}^{(j)}|\mathbf{y})}{p(\mathbf{x}_t|\mathbf{y})} \text{sim}(\mathbf{x}_t, \mathbf{x}^{(j)})} \epsilon_i \\ &= \sum_{\mathbf{x}^{(i)} \in D-\{\mathbf{x}_y\}} \frac{\frac{N-n}{N(N-1)} \text{sim}(\mathbf{x}_t, \mathbf{x}^{(i)})}{\sum_{j=1}^{|\{\mathbf{x}_y\}|} \frac{n}{N} \text{sim}(\mathbf{x}_t, \mathbf{x}^{(j)}) + \sum_{j=1}^{|D-\{\mathbf{x}_y\}|} \frac{N-n}{N(N-1)} \text{sim}(\mathbf{x}_t, \mathbf{x}^{(j)})} \epsilon_i \\ &= \sum_{\mathbf{x}^{(i)} \in D-\{\mathbf{x}_y\}} \frac{\text{sim}(\mathbf{x}_t, \mathbf{x}^{(i)})}{\sum_{j=1}^{|\{\mathbf{x}_y\}|} \frac{n(N-1)}{N-n} \text{sim}(\mathbf{x}_t, \mathbf{x}^{(j)}) + \sum_{j=1}^{|D-\{\mathbf{x}_y\}|} \text{sim}(\mathbf{x}_t, \mathbf{x}^{(j)})} \epsilon_i \\ &= \sum_{\mathbf{x}^{(i)} \in D-\{\mathbf{x}_y\}} \frac{\text{sim}(\mathbf{x}_t, \mathbf{x}^{(i)})}{\sum_{\mathbf{x}^{(j)} \in \{\mathbf{x}_y\}} \lambda \cdot \text{sim}(\mathbf{x}_t, \mathbf{x}^{(j)}) + \sum_{\mathbf{x}^{(j)} \in D-\{\mathbf{x}_y\}} \text{sim}(\mathbf{x}_t, \mathbf{x}^{(j)})} \epsilon_i. \end{aligned} \quad (20)$$

With 14 and 18, the final expression becomes :

$$\epsilon_{\text{opt}}(\mathbf{x}_t, \mathbf{y}, t) = \sum_{\mathbf{x}^{(i)} \in D} \frac{w_i}{\sum_{\mathbf{x}^{(j)} \in D} w_j} \cdot \epsilon_i, \quad (21)$$

where

$$\begin{aligned} \epsilon_i &= \frac{\mathbf{x}_t - \sqrt{\alpha_t}\mathbf{x}^{(i)}}{\sigma_t}, \quad \lambda = \frac{n(N-1)}{N-n}, \\ w_i &= \begin{cases} \lambda \cdot \text{sim}(\mathbf{x}_t, \mathbf{x}^{(i)}) = \lambda \cdot \exp\left(-\frac{\|\mathbf{x}_t - \sqrt{\alpha_t}\mathbf{x}^{(i)}\|_2^2}{2\sigma_t^2}\right), & \mathbf{x}^{(i)} \in \{\mathbf{x}_y\}, \\ \text{sim}(\mathbf{x}_t, \mathbf{x}^{(i)}) = \exp\left(-\frac{\|\mathbf{x}_t - \sqrt{\alpha_t}\mathbf{x}^{(i)}\|_2^2}{2\sigma_t^2}\right), & \mathbf{x}^{(i)} \in D - \{\mathbf{x}_y\}, \end{cases} \end{aligned}$$

When  $n \rightarrow N$ , we have  $\lambda \rightarrow \infty$ , and the weights on unaligned (negative) samples vanish. Hence, the optimal predictor becomes fully dominated by aligned (positive) samples, recovering a perfect class-conditional denoiser.

□

**Supplementary Explanation: From  $\epsilon_\theta$  to  $\epsilon_{\text{opt}}$  in Equation (13)** In the initial step of the proof, we consider the expected squared error between the model’s predicted noise  $\epsilon_\theta(\mathbf{x}_t, t, y)$  and the ground-truth noise  $\epsilon_i$ , averaged over a conditional distribution of data samples:

$$\mathbb{E}_{\mathbf{x}^{(i)} \sim p(\mathbf{x}^{(i)} | \mathbf{x}_t, y)} \left[ \|\epsilon_\theta(\mathbf{x}_t, t, y) - \epsilon_i\|_2^2 \right].$$

To find the optimal prediction under this objective, we differentiate the expected error with respect to the model’s output  $\epsilon_\theta$ , and set the gradient to zero:

$$\frac{\partial}{\partial \epsilon_\theta(\mathbf{x}_t, t, y)} \mathbb{E}_{\mathbf{x}^{(i)} \sim p(\mathbf{x}^{(i)} | \mathbf{x}_t, y)} \left[ \|\epsilon_\theta(\mathbf{x}_t, t, y) - \epsilon_i\|_2^2 \right] = 0.$$

At this stage,  $\epsilon_\theta$  is treated as a free variable (i.e., an optimization target) rather than a fixed model prediction. The goal is to compute the value of  $\epsilon_\theta$  that minimizes the expected squared error.

Solving this equation yields the value of  $\epsilon_\theta$  that achieves the minimum. We denote this solution as:

$$\epsilon_{\text{opt}}(\mathbf{x}_t, t, y) := \arg \min_{\epsilon_\theta} \mathbb{E}_{\mathbf{x}^{(i)} \sim p(\mathbf{x}^{(i)} | \mathbf{x}_t, y)} \left[ \|\epsilon_\theta(\mathbf{x}_t, t, y) - \epsilon_i\|_2^2 \right].$$

This optimal solution corresponds to the expected value of the ground-truth noise under the given conditional distribution. Thus, while the derivation begins by optimizing with respect to  $\epsilon_\theta$ , the result is a closed-form expression for the optimal value, which we denote  $\epsilon_{\text{opt}}$  to distinguish it from arbitrary predictions made by a parametric model.

## 2 Notations

Table 1: Notations used in our method.

| Symbol                                    | Description                                                                                                    |
|-------------------------------------------|----------------------------------------------------------------------------------------------------------------|
| $\mathbf{x}_0$                            | Clean image sampled from real data distribution $q(\mathbf{x}_0)$ .                                            |
| $\mathbf{x}_y^\pm$                        | Clean image $\mathbf{x}_0$ aligned $(+)$ or misaligned $(-)$ with prompt $y$ in preference pairs.              |
| $\mathbf{x}_{t;y}^\pm$                    | Noisy version of $\mathbf{x}_y^\pm$ at timestep $t$ .                                                          |
| $\mathbf{x}_{y^\pm}$                      | Clean image $\mathbf{x}_0$ conditioned on aligned $(+)$ and misaligned $(-)$ prompts $y^\pm$ .                 |
| $\epsilon$                                | Ground-truth noise sampled from $\mathcal{N}(0, I)$ , added during forward diffusion.                          |
| $\epsilon_\theta(\mathbf{x}, t)$          | Noise predicted by the model $\epsilon_\theta$ at timestep $t$ , given noisy input $\mathbf{x}$ .              |
| $\epsilon_{\text{ali}}(\mathbf{x}, y, t)$ | Noise predicted by the ideal alignment model for input image $\mathbf{x}$ , prompt $y$ and timestep $t$ .      |
| $\epsilon_{\text{ref}}(\mathbf{x}, y, t)$ | Noise predicted by the reference diffusion model for input image $\mathbf{x}$ , prompt $y$ and timestep $t$ .  |
| $\epsilon_{\text{opt}}(\mathbf{x}, y, t)$ | Noise predicted by the optimal diffusion model for input image $\mathbf{x}$ , prompt $y$ and timestep $t$ .    |
| $s_\theta(\mathbf{x}, t)$                 | Score predicted by the training model for image sample $\mathbf{x}$ and prompt $y$ .                           |
| $s_{\text{ref}}(\mathbf{x}, y)$           | Score predicted by the reference model for image sample $\mathbf{x}$ and prompt $y$ .                          |
| $\delta$                                  | Margin used to enforce separation between aligned $(+)$ and misaligned $(-)$ scores.                           |
| $\Delta_y^\pm$                            | Margin offsets applied to the expected scores of aligned $(+)$ and misaligned $(-)$ images with prompt $y$ .   |
| $O_y^\pm$                                 | Ideal score targets for aligned $(+)$ and misaligned $(-)$ images with prompt $y$ .                            |
| $\eta_y^\pm$                              | Scaling factors that modulate the contributions of aligned $(+)$ and misaligned $(-)$ images with prompt $y$ . |
| $\iota(x_y^-, x_y^+, y)$                  | Score difference in ABC loss between aligned $(+)$ and misaligned $(-)$ images with prompt $y$ .               |

### 3 More Evaluation Details

Table 2: Win rate on PartiPrompts for SD1.5 and SDXL-based models.

|                | PickScore                           | HPS                                 | Aesthetics                          | CLIP                                |
|----------------|-------------------------------------|-------------------------------------|-------------------------------------|-------------------------------------|
| vs. SD1.5-Base | <b>60.02 <math>\pm</math> 2.40%</b> | <b>81.51 <math>\pm</math> 2.21%</b> | <b>74.27 <math>\pm</math> 2.14%</b> | <b>59.72 <math>\pm</math> 2.45%</b> |
| vs. SD1.5-DPO  | <b>55.85 <math>\pm</math> 2.44%</b> | <b>73.02 <math>\pm</math> 2.38%</b> | <b>64.90 <math>\pm</math> 2.34%</b> | 44.97 $\pm$ 2.43%                   |
| vs. SD1.5-SPO  | <b>51.16 <math>\pm</math> 2.41%</b> | <b>61.59 <math>\pm</math> 2.41%</b> | 47.60 $\pm$ 2.45%                   | <b>60.02 <math>\pm</math> 2.36%</b> |
| vs. SD1.5-KTO  | <b>57.77 <math>\pm</math> 2.41%</b> | 44.72 $\pm$ 2.38%                   | <b>53.90 <math>\pm</math> 2.44%</b> | 47.22 $\pm$ 2.45%                   |
| vs. SDXL-Base  | <b>74.38 <math>\pm</math> 1.84%</b> | <b>79.26 <math>\pm</math> 1.97%</b> | <b>80.20 <math>\pm</math> 1.56%</b> | <b>52.46 <math>\pm</math> 2.04%</b> |
| vs. SDXL-DPO   | <b>73.22 <math>\pm</math> 2.18%</b> | <b>72.50 <math>\pm</math> 2.33%</b> | <b>68.25 <math>\pm</math> 1.39%</b> | <b>50.51 <math>\pm</math> 1.88%</b> |
| vs. SDXL-SPO   | <b>52.49 <math>\pm</math> 2.34%</b> | 40.31 $\pm$ 2.44%                   | <b>59.93 <math>\pm</math> 2.41%</b> | <b>55.53 <math>\pm</math> 2.44%</b> |
| vs. SDXL-MAPO  | <b>65.35 <math>\pm</math> 1.81%</b> | <b>81.17 <math>\pm</math> 2.07%</b> | <b>72.10 <math>\pm</math> 1.82%</b> | 46.97 $\pm$ 2.06%                   |

Table 3: Win rate on HPS benchmarks for SD1.5 and SDXL-based models.

|                | PickScore                           | HPS                                 | Aesthetics                          | CLIP                                |
|----------------|-------------------------------------|-------------------------------------|-------------------------------------|-------------------------------------|
| vs. SD1.5-Base | <b>74.83 <math>\pm</math> 3.10%</b> | <b>85.75 <math>\pm</math> 2.87%</b> | <b>68.84 <math>\pm</math> 3.31%</b> | <b>59.65 <math>\pm</math> 3.53%</b> |
| vs. SD1.5-DPO  | <b>53.46 <math>\pm</math> 3.51%</b> | <b>71.50 <math>\pm</math> 3.46%</b> | <b>64.19 <math>\pm</math> 3.56%</b> | <b>52.06 <math>\pm</math> 3.57%</b> |
| vs. SD1.5-SPO  | 45.35 $\pm$ 3.57%                   | <b>54.99 <math>\pm</math> 3.53%</b> | 38.08 $\pm$ 3.47%                   | <b>64.83 <math>\pm</math> 3.13%</b> |
| vs. SD1.5-KTO  | <b>52.28 <math>\pm</math> 3.52%</b> | 42.88 $\pm$ 3.48%                   | <b>52.86 <math>\pm</math> 3.57%</b> | <b>53.93 <math>\pm</math> 3.55%</b> |
| vs. SDXL-Base  | <b>79.35 <math>\pm</math> 2.23%</b> | <b>70.17 <math>\pm</math> 2.58%</b> | <b>72.28 <math>\pm</math> 2.86%</b> | <b>60.38 <math>\pm</math> 3.26%</b> |
| vs. SDXL-DPO   | <b>77.26 <math>\pm</math> 3.06%</b> | <b>69.54 <math>\pm</math> 3.42%</b> | <b>70.19 <math>\pm</math> 2.39%</b> | <b>57.06 <math>\pm</math> 3.07%</b> |
| vs. SDXL-SPO   | <b>51.16 <math>\pm</math> 3.34%</b> | <b>52.41 <math>\pm</math> 3.57%</b> | 46.78 $\pm$ 3.53%                   | <b>59.87 <math>\pm</math> 3.58%</b> |
| vs. SDXL-MAPO  | <b>68.55 <math>\pm</math> 2.37%</b> | <b>64.89 <math>\pm</math> 3.11%</b> | <b>68.18 <math>\pm</math> 2.96%</b> | <b>51.14 <math>\pm</math> 3.19%</b> |

Table 4: Scores on PartiPrompts for SD1.5 and SDXL-based models.

|            | PickScore        | HPS              | Aesthetics      | CLIP             |
|------------|------------------|------------------|-----------------|------------------|
| SD1.5-Base | 21.25 $\pm$ 2.02 | 26.98 $\pm$ 2.85 | 5.29 $\pm$ 1.17 | 29.57 $\pm$ 9.71 |
| SD1.5-DPO  | 21.49 $\pm$ 2.19 | 27.16 $\pm$ 3.13 | 5.36 $\pm$ 1.08 | 29.80 $\pm$ 9.46 |
| SD1.5-SPO  | 21.53 $\pm$ 2.33 | 27.33 $\pm$ 3.74 | 5.89 $\pm$ 1.04 | 28.13 $\pm$ 9.23 |
| SD1.5-KTO  | 21.46 $\pm$ 1.96 | 27.70 $\pm$ 3.21 | 5.62 $\pm$ 0.99 | 30.78 $\pm$ 8.09 |
| SD1.5-ABC  | 21.85 $\pm$ 2.04 | 27.97 $\pm$ 2.85 | 5.93 $\pm$ 1.01 | 31.07 $\pm$ 8.14 |
| SDXL-Base  | 22.76 $\pm$ 2.45 | 28.49 $\pm$ 3.59 | 5.86 $\pm$ 1.05 | 35.76 $\pm$ 9.66 |
| SDXL-DPO   | 22.94 $\pm$ 2.37 | 28.93 $\pm$ 3.52 | 6.01 $\pm$ 0.98 | 36.01 $\pm$ 8.73 |
| SDXL-SPO   | 23.56 $\pm$ 2.64 | 29.12 $\pm$ 3.52 | 6.26 $\pm$ 0.92 | 33.82 $\pm$ 9.84 |
| SDXL-MAPO  | 22.82 $\pm$ 2.40 | 28.62 $\pm$ 3.62 | 5.98 $\pm$ 1.04 | 36.58 $\pm$ 9.39 |
| SDXL-ABC   | 23.79 $\pm$ 2.27 | 29.42 $\pm$ 3.29 | 6.35 $\pm$ 0.89 | 36.81 $\pm$ 8.51 |

Table 5: Scores on HPS benchmarks for SD1.5 and SDXL-based models.

|            | PickScore        | HPS              | Aesthetics      | CLIP             |
|------------|------------------|------------------|-----------------|------------------|
| SD1.5-Base | 21.17 $\pm$ 2.45 | 27.61 $\pm$ 3.10 | 5.45 $\pm$ 1.01 | 35.73 $\pm$ 7.38 |
| SD1.5-DPO  | 21.71 $\pm$ 2.41 | 28.23 $\pm$ 3.35 | 5.59 $\pm$ 0.99 | 36.66 $\pm$ 7.95 |
| SD1.5-SPO  | 21.99 $\pm$ 2.76 | 28.53 $\pm$ 3.69 | 5.96 $\pm$ 1.10 | 33.14 $\pm$ 9.15 |
| SD1.5-KTO  | 21.79 $\pm$ 2.53 | 28.95 $\pm$ 3.12 | 5.62 $\pm$ 0.96 | 37.01 $\pm$ 8.01 |
| SD1.5-ABC  | 21.97 $\pm$ 2.45 | 28.86 $\pm$ 3.02 | 5.72 $\pm$ 0.87 | 37.18 $\pm$ 7.72 |
| SDXL-Base  | 23.26 $\pm$ 2.50 | 29.38 $\pm$ 3.59 | 6.08 $\pm$ 1.03 | 37.24 $\pm$ 6.74 |
| SDXL-DPO   | 23.59 $\pm$ 2.65 | 29.86 $\pm$ 3.40 | 6.14 $\pm$ 1.00 | 38.34 $\pm$ 5.98 |
| SDXL-SPO   | 23.76 $\pm$ 2.70 | 30.30 $\pm$ 3.18 | 6.48 $\pm$ 0.86 | 37.62 $\pm$ 7.14 |
| SDXL-MAPO  | 23.60 $\pm$ 2.53 | 29.92 $\pm$ 3.52 | 6.19 $\pm$ 0.92 | 38.61 $\pm$ 7.17 |
| SDXL-ABC   | 24.39 $\pm$ 2.38 | 30.67 $\pm$ 3.08 | 6.54 $\pm$ 0.86 | 38.97 $\pm$ 6.02 |

We report extended evaluation tables with empirical confidence intervals, computed by discarding the top 5% of deviations from the mean to cover 95% of the scores. We also provide the absolute scores for each setting.

## 4 More Visualization Results

Table 6: Detailed prompts used for generated images in Figure 3.

| Image       | Prompt                                                                                                                                                   |
|-------------|----------------------------------------------------------------------------------------------------------------------------------------------------------|
| Row 1, Col1 | A view of the Orion constellation in the night sky.                                                                                                      |
| Row 1, Col2 | Snow mountain and tree reflection in the lake.                                                                                                           |
| Row 1, Col3 | An old oil painting of Dubrovnik on canvas.                                                                                                              |
| Row 1, Col4 | A white country home with a wrap-around porch.                                                                                                           |
| Row 1, Col5 | Sunset over the sea.                                                                                                                                     |
| Row 2, Col1 | Two pianos next to each other.                                                                                                                           |
| Row 2, Col2 | Teacups surrounding a kettle.                                                                                                                            |
| Row 2, Col3 | A pumpkin with a candle in it.                                                                                                                           |
| Row 2, Col4 | An impressionistic painting of tree and a building.                                                                                                      |
| Row 2, Col5 | A plant with small flowers with purple petals.                                                                                                           |
| Row 3, Col1 | A cinematic shot of Avatar Azula.                                                                                                                        |
| Row 3, Col2 | An anime-style depiction of a boy that showcases impressive artistic skill.                                                                              |
| Row 3, Col3 | One child on a couch.                                                                                                                                    |
| Row 3, Col4 | A portrait of young girl.                                                                                                                                |
| Row 3, Col5 | A smiling beautiful sorceress wearing a modest high necked blue suit surrounded by swirling rainbow aurora, hyper-realistic, cinematic, post-production. |
| Row 4, Col1 | A rabbit sitting on a turtle's back.                                                                                                                     |
| Row 4, Col2 | A young badger delicately sniffing yellow roses, richly textured oil painting.                                                                           |
| Row 4, Col3 | A pile of chicken eggs with a confused chicken nearby.                                                                                                   |
| Row 4, Col4 | An eagle.                                                                                                                                                |
| Row 4, Col5 | A cute digital art of a unicorn.                                                                                                                         |
| Row 5, Col1 | Anime illustration of Gundam mech suit on Pixiv.                                                                                                         |
| Row 5, Col2 | A room with two chairs and paintings.                                                                                                                    |
| Row 5, Col3 | A picture of some food in the plate.                                                                                                                     |
| Row 5, Col4 | A shiny VW van with a cityscape painted on it and parked on grass.                                                                                       |
| Row 5, Col5 | Splashing milk and berries in a porcelain bowl, vintage wooden tabletop, black background, soft light.                                                   |

Table 7: Detailed prompts used for generated images in Figure 6.

| Image       | Prompt                                                                                                                                                 |
|-------------|--------------------------------------------------------------------------------------------------------------------------------------------------------|
| Row 1, Col1 | A realistic and elegant depiction of a young Garfield in the style of Stefan Kostic by Stanley Lau, also known as Artgerm.                             |
| Row 1, Col2 | A 3D model of Huggy Wuggy from Poppy Playtime video game, depicted as an oil painting in a hyperrealistic style by Yanjun Cheng.                       |
| Row 1, Col3 | An oil painting of astronauts in space.                                                                                                                |
| Row 1, Col4 | A close-up portrait of a girl with an autumn leaves headdress.                                                                                         |
| Row 1, Col5 | Album cover featuring a golden swimming princess, created by Conrad Roset.                                                                             |
| Row 2, Col1 | A skyline with several buildings with old architecture.                                                                                                |
| Row 2, Col2 | A futuristic building towers above a river, reflecting on the water with beautiful lighting.                                                           |
| Row 2, Col3 | A castle with towers and catapults is heading towards an iceberg at dawn in a highly detailed painting.                                                |
| Row 2, Col4 | The image features a cathedral-like structure in a canyon grotto, created by Sparth and Greg Rutkowski with micro details and 3D sculpture techniques. |
| Row 2, Col5 | A Chinese painting of Shanghai featuring blooming sakura trees.                                                                                        |
| Row 3, Col1 | Fruit and vegetable displayed in glass container on table.                                                                                             |
| Row 3, Col2 | One slice of simple cheese pizza on a paper plate.                                                                                                     |
| Row 3, Col3 | A collage of roses painted in oil by Anders Zorn, with intricate detail and elegant composition.                                                       |
| Row 3, Col4 | A throw rug on the floor.                                                                                                                              |
| Row 3, Col5 | Graffiti of a rocket ship on a brick wall.                                                                                                             |
| Row 4, Col1 | Three-quarters front view of a blue 1977 Ford F-150 coming around a curve in a mountain road and looking over a green valley on a cloudy day.          |
| Row 4, Col2 | An armchair in the shape of an avocado.                                                                                                                |
| Row 4, Col3 | A detailed portrait of a Border Collie with ominous atmosphere.                                                                                        |
| Row 4, Col4 | A small house in the wilderness.                                                                                                                       |
| Row 4, Col5 | The image depicts the character Totoro from Studio Ghibli, illustrated by Joe Fenton.                                                                  |
| Row 5, Col1 | An office break room with a table.                                                                                                                     |
| Row 5, Col2 | A living room filled with books furniture and a flat screen TV.                                                                                        |
| Row 5, Col3 | An advertising painting of a tennis court with bright colors, featuring art by Claude Monet done in impressionistic oil painting style.                |
| Row 5, Col4 | A wooden deck overlooking a mountain valley.                                                                                                           |
| Row 5, Col5 | A kitchen has a stainless steel refrigerator and other appliances.                                                                                     |

| Prompts                                                                                 | SDXL-Base                                                                         | SDXL-DPO                                                                          | SDXL-SPO                                                                          | SDXL-MAPO                                                                          | SDXL-ABC                                                                            |
|-----------------------------------------------------------------------------------------|-----------------------------------------------------------------------------------|-----------------------------------------------------------------------------------|-----------------------------------------------------------------------------------|------------------------------------------------------------------------------------|-------------------------------------------------------------------------------------|
| <i>"KEEP OFF THE GRASS"<br/>on a sign<br/>next to a lawn.</i>                           |  |  |  |  |  |
| <i>Red and yellow<br/>balloons<br/>hanging from a<br/>ceiling fan.</i>                  |  |  |  |  |  |
| <i>A wombat<br/>wearing a<br/>white panama<br/>hat and a floral<br/>Hawaiian shirt.</i> |  |  |  |  |  |
| <i>A robot kicking<br/>a soccer ball.</i>                                               |  |  |  |  |  |

Figure 1: Qualitative Comparison for SDXL based Text-to-Image Alignment.

| Prompts                                                              | SDXL-Base                                                                           | SDXL-DPO                                                                            | SDXL-SPO                                                                            | SDXL-MAPO                                                                            | SDXL-ABC                                                                              |
|----------------------------------------------------------------------|-------------------------------------------------------------------------------------|-------------------------------------------------------------------------------------|-------------------------------------------------------------------------------------|--------------------------------------------------------------------------------------|---------------------------------------------------------------------------------------|
| <i>A close-up of a<br/>long-island ice<br/>tea cocktail.</i>         |  |  |  |  |  |
| <i>A kitchen in<br/>natural wood<br/>style.</i>                      |  |  |  |  |  |
| <i>A beat-up truck<br/>at the base of<br/>the Great<br/>Pyramid.</i> |  |  |  |  |  |
| <i>A palm tree<br/>forest in front<br/>of the Kremlin.</i>           |  |  |  |  |  |

Figure 2: Qualitative Comparison for SDXL based Aesthetic Alignment.



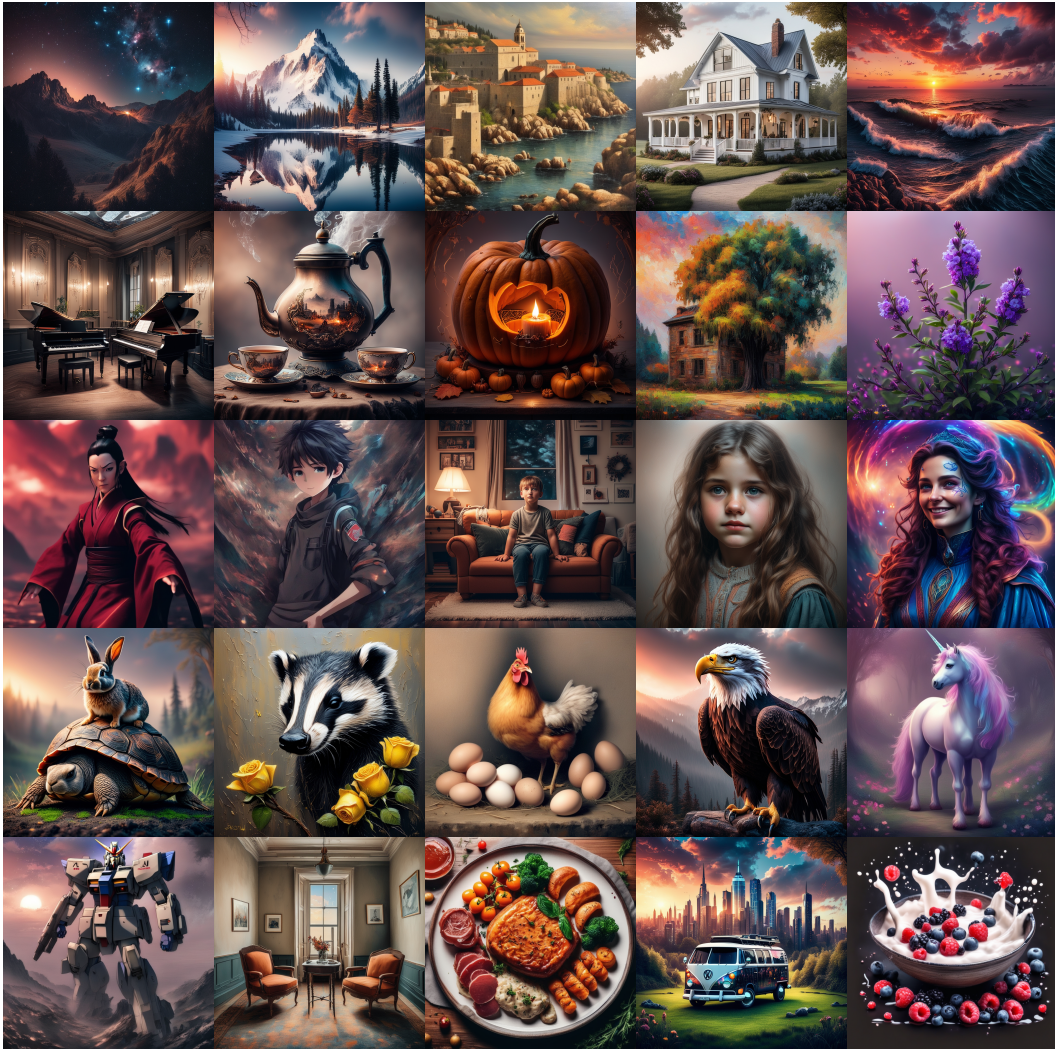

Figure 3: Sample Images Generated by SDXL-ABC. Prompts are provided in Table 6.



| Prompts                                                                                             | SD1.5-Base | SD1.5-DPO | SD1.5-SPO | SD1.5-KTO | SD1.5-ABC |
|-----------------------------------------------------------------------------------------------------|------------|-----------|-----------|-----------|-----------|
| <i>Ceramic bowl with <b>two</b> ice cream scoops, <b>blueberries</b>, and <b>banana</b> slices.</i> |            |           |           |           |           |
| <i>A small round wooden <b>table</b> beside a sofa, with <b>a potted plant</b> on top.</i>          |            |           |           |           |           |
| <i>Gray tote bag on a hanger with <b>a black cat</b> print.</i>                                     |            |           |           |           |           |
| <i>A strawberry shortcake with <b>one</b> burning candle standing behind it.</i>                    |            |           |           |           |           |

Figure 4: Qualitative Comparison for SD1.5 based Text-to-Image Alignment.

| Prompts                                                                           | SD1.5-Base | SD1.5-DPO | SD1.5-SPO | SD1.5-KTO | SD1.5-ABC |
|-----------------------------------------------------------------------------------|------------|-----------|-----------|-----------|-----------|
| <i>A digital painting of a motorcycle in sharp focus, created as concept art.</i> |            |           |           |           |           |
| <i>The benches along the sidewalk are covered with snow.</i>                      |            |           |           |           |           |
| <i>Two men at a cafe talking about something.</i>                                 |            |           |           |           |           |
| <i>A wizard with fox-like features in detailed, furry artwork.</i>                |            |           |           |           |           |

Figure 5: Qualitative Comparison for SD1.5 based Aesthetic Alignment.



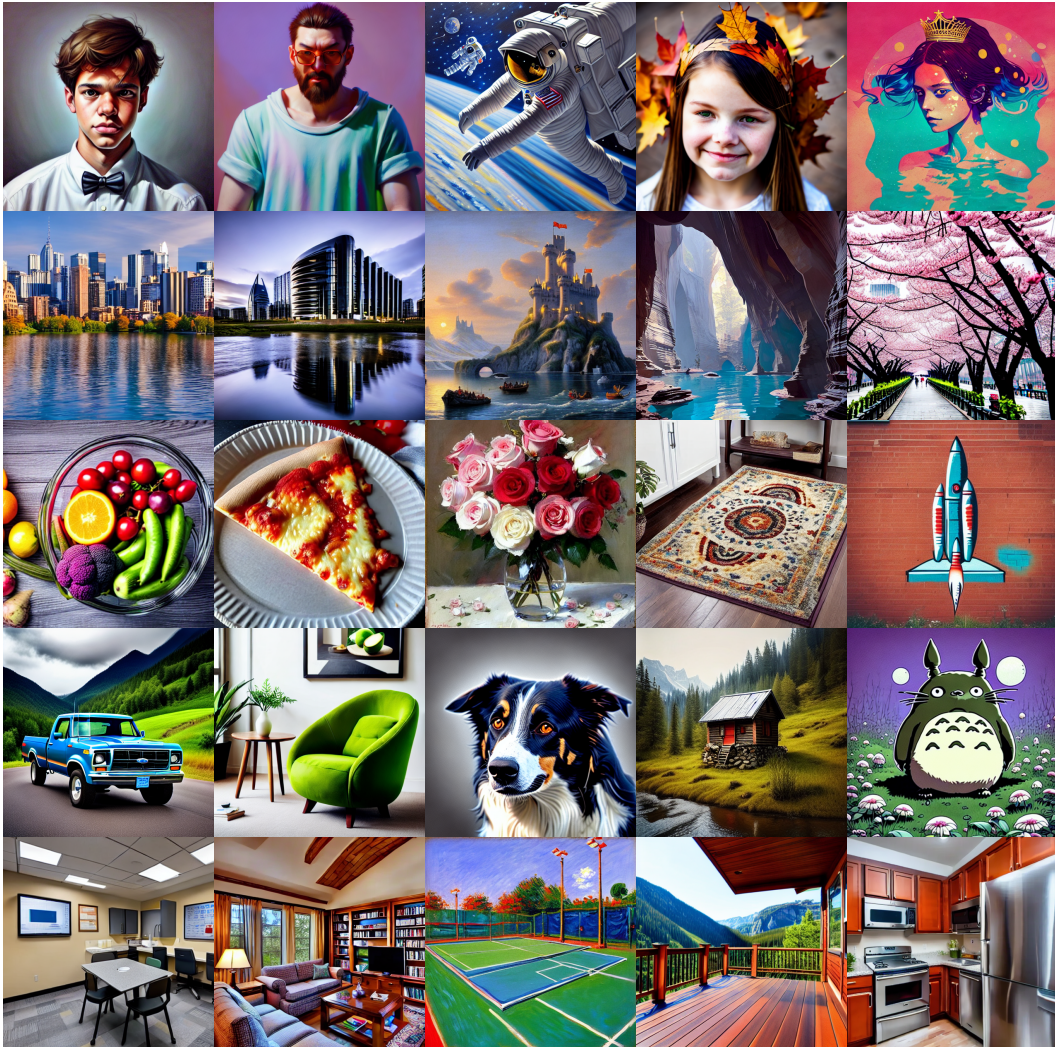

Figure 6: Sample Images Generated by SD1.5-ABC. Prompts are provided in Table 7.
